# Supplementary material for: Differing patterns in thermal injury incidence and hospitalisations among 0–4 year old children from England
Source: PubMed Central journal article supplement (PMC5062947; doi:10.1016/j.burns.2016.05.007), 2016-11
Supplement: mmc1.pdf [file mmc1.pdf]

## Supplementary file 1: List of Read codes referring to thermal injuries

- Read codes are used to extract thermal injury records from the CPRD (primary care data).

| Read Code | Description of Read code                                     |
|-----------|--------------------------------------------------------------|
| 7G2C.00   | Operations on burnt skin                                     |
| 7G2C.11   | Operations on burnt skin including head or neck              |
| 7G2C100   | Toilet or clean burnt skin NEC                               |
| 7G2C200   | Debridement of burnt skin of head and neck                   |
| 7G2C300   | Debridement of burnt skin NEC                                |
| 7G2C500   | Tangent excision of burnt skin of head or neck               |
| 7G2C600   | Tangent excision of burnt skin NEC                           |
| 7G2C700   | Escharotomy of burnt skin of head                            |
| 7G2C900   | Escharotomy of burnt skin of chest                           |
| 7G2CA00   | Escharotomy of burnt skin of arm                             |
| 7G2CB00   | Escharotomy of burnt skin of hand                            |
| 7G2CC00   | Escharotomy of burnt skin of leg                             |
| 7G2CD00   | Escharotomy of burnt skin of foot                            |
| 7G2CE00   | Removal of slough from burnt skin NEC                        |
| 7G2CE11   | Escharotomy of burnt skin NEC                                |
| 7G2CG00   | Dress burnt skin head or neck us vacuum assisted clos device |
| 7G2CH00   | Cleansing and sterilisation of burnt skin NEC                |
| 7G2Cy00   | Other specified toilet to burnt skin                         |
| 7G2Cz00   | Toilet to burnt skin NOS                                     |
| 7G2E000   | Dressing of burnt skin of head or neck                       |
| 7G2E100   | Dressing of burnt skin NEC                                   |
| 7G2E600   | Attention to dressing of burn of head or neck                |
| 7G2E700   | Attention to dressing of burnt skin NEC                      |
| 7G2F.11   | Exploration of skin wound or burn                            |
| 7G2F300   | Exploration of burnt skin NEC                                |
| 7G2Fv00   | Exploration of burnt skin of other site NOS                  |
| 81H2.00   | Dressing of burn                                             |
| 8H15.00   | Admit to burns unit                                          |
| 8H5E.00   | Burns referral                                               |
| 9N0z.00   | Seen in burns clinic                                         |
| 9b8A000   | Burns care                                                   |
| R020100   | [D]Burning of skin                                           |
| SH...00   | Burns                                                        |
| SH...11   | Scalds                                                       |
| SH0..00   | Burn confined to eye and adnexa                              |
| SH0..11   | Conjunctival burns                                           |
| SH0..12   | Corneal burns                                                |
| SH0..13   | Eyelid burns                                                 |
| SH0..14   | Periocular burns                                             |
| SH01.00   | Other burns of eyelids and periocular area                   |
| SH05.00   | Burn resulting in eyeball rupture and destruction of eyeball |
| SH0x.00   | Burn of eyelid NOS                                           |

|         |                                                              |
|---------|--------------------------------------------------------------|
| SH0y.00 | Burn of cornea NOS                                           |
| SH0z.00 | Burn confined to eye and adnexa NOS                          |
| SH1..00 | Burn of the face, head or neck                               |
| SH1..11 | Face burns                                                   |
| SH1..12 | Head burns                                                   |
| SH10.00 | Unspecified thickness burn of the face, head or neck         |
| SH10000 | Unspecified thickness burn of unspecified part of face/head  |
| SH10100 | Unspecified thickness burn of the ear                        |
| SH10200 | Unspecified thickness burn of the eye                        |
| SH10300 | Unspecified thickness burn of the lip(s)                     |
| SH10400 | Unspecified thickness burn of the chin                       |
| SH10500 | Unspecified thickness burn of the nose                       |
| SH10600 | Unspecified thickness burn of the scalp                      |
| SH10700 | Unspecified thickness burn of the forehead                   |
| SH10800 | Unspecified thickness burn of the cheek                      |
| SH10900 | Unspecified thickness burn of the neck                       |
| SH10x00 | Unspecified thickness burn multiple sites face, head or neck |
| SH10z00 | Unspecified thickness burn of the face, head or neck NOS     |
| SH11.00 | Superficial burn of the face, head or neck                   |
| SH11.11 | Erythema of head or neck, first degree burn                  |
| SH11000 | Superficial burn of unspecified part of the face or head     |
| SH11100 | Superficial burn of the ear                                  |
| SH11200 | Superficial burn of the eye                                  |
| SH11300 | Superficial burn of the lip(s)                               |
| SH11400 | Superficial burn of the chin                                 |
| SH11500 | Superficial burn of the nose                                 |
| SH11600 | Superficial burn of the scalp                                |
| SH11700 | Superficial burn of the forehead                             |
| SH11800 | Superficial burn of the cheek                                |
| SH11900 | Superficial burn of the neck                                 |
| SH11x00 | Superficial burn of multiple sites of the face, head or neck |
| SH11z00 | Superficial burn of the face, head or neck NOS               |
| SH12.00 | Partial thickness burn of the face, head or neck             |
| SH12.11 | Blister of face, head and neck, second degree burn           |
| SH12000 | Superficial part. thickness burn unspecified part face/head  |
| SH12100 | Superficial partial thickness burn of the ear                |
| SH12111 | Ear - 2nd degree burn                                        |
| SH12200 | Superficial partial thickness burn of the eye                |
| SH12211 | Eye - 2nd degree burn                                        |
| SH12300 | Superficial partial thickness burn of the lip(s)             |
| SH12311 | Lip - 2nd degree burn                                        |
| SH12400 | Superficial partial thickness burn of the chin               |
| SH12500 | Superficial partial thickness burn of the nose               |
| SH12600 | Superficial partial thickness burn of the scalp              |
| SH12611 | Scalp - 2nd degree burn                                      |
| SH12700 | Superficial partial thickness burn of the forehead           |

|         |                                                              |
|---------|--------------------------------------------------------------|
| SH12711 | Forehead - 2nd degree burn                                   |
| SH12800 | Superficial partial thickness burn of the cheek              |
| SH12811 | Cheek - 2nd degree burn                                      |
| SH12900 | Superficial partial thickness burn of the neck               |
| SH12A00 | Deep partial thickness burn of unspecified part of face/head |
| SH12B00 | Deep partial thickness burn of the ear                       |
| SH12C00 | Deep partial thickness burn of the eye                       |
| SH12E00 | Deep partial thickness burn of the chin                      |
| SH12G00 | Deep partial thickness burn of the scalp                     |
| SH12x00 | Partial thickness burn of multiple sites face, head or neck  |
| SH12z00 | Partial thickness burn of the face, head or neck NOS         |
| SH13.00 | Full thickness burn of the face, head or neck                |
| SH13000 | Full thickness burn of unspecified part of the face or head  |
| SH13100 | Full thickness burn of the ear                               |
| SH13200 | Full thickness burn of the eye                               |
| SH13300 | Full thickness burn of the lip(s)                            |
| SH13500 | Full thickness burn of the nose                              |
| SH13600 | Full thickness burn of the scalp                             |
| SH13700 | Full thickness burn of the forehead                          |
| SH13800 | Full thickness burn of the cheek                             |
| SH13900 | Full thickness burn of the neck                              |
| SH13x00 | Full thickness burn of multiple sites of face, head or neck  |
| SH14100 | Deep full thickness burn of ear without loss of body part    |
| SH14200 | Deep full thickness burn of eye without loss of body part    |
| SH14600 | Deep full thickness burn of scalp without loss of body part  |
| SH14900 | Deep full thickness burn of neck without loss of body part   |
| SH15100 | Deep full thickness burn of the ear, with loss of body part  |
| SH1z.00 | Burn of the face, head or neck NOS                           |
| SH2..00 | Burn of the trunk                                            |
| SH20.00 | Unspecified thickness burn of the trunk                      |
| SH20000 | Unspecified thickness burn of unspecified part of the trunk  |
| SH20100 | Unspecified thickness burn of the breast                     |
| SH20200 | Unspecified thickness burn of the chest wall                 |
| SH20300 | Unspecified thickness burn of the abdominal wall             |
| SH20400 | Unspecified thickness burn of the back (excluding buttock)   |
| SH20500 | Unspecified thickness burn of the buttock                    |
| SH20600 | Unspecified thickness burn of the genitalia                  |
| SH20x00 | Unspecified thickness burn of multiple sites of the trunk    |
| SH20z00 | Unspecified thickness burn of the trunk NOS                  |
| SH21.00 | Superficial burn of the trunk                                |
| SH21.11 | Erythema of trunk, 1st degree burn                           |
| SH21000 | Superficial burn of unspecified part of the trunk            |
| SH21100 | Superficial burn of the breast                               |
| SH21200 | Superficial burn of the chest wall                           |
| SH21300 | Superficial burn of the abdominal wall                       |
| SH21400 | Superficial burn of the back (excluding buttock)             |

|         |                                                              |
|---------|--------------------------------------------------------------|
| SH21500 | Superficial burn of the buttock                              |
| SH21600 | Superficial burn of the genitalia                            |
| SH21z00 | Superficial burn of the trunk NOS                            |
| SH22.00 | Partial thickness burn of the trunk                          |
| SH22.11 | Blister of trunk, second degree burn                         |
| SH22000 | Superficial partial thickness burn unspecified part of trunk |
| SH22100 | Superficial partial thickness burn of the breast             |
| SH22200 | Superficial partial thickness burn of the chest wall         |
| SH22300 | Superficial partial thickness burn of the abdominal wall     |
| SH22400 | Superficial partial thickness burn of back (excl buttock)    |
| SH22500 | Superficial partial thickness burn of the buttock            |
| SH22600 | Superficial partial thickness burn of the genitalia          |
| SH22800 | Deep partial thickness burn of the breast                    |
| SH22900 | Deep partial thickness burn of the chest wall                |
| SH22A00 | Deep partial thickness burn of the abdominal wall            |
| SH22B00 | Deep partial thickness burn of the back (excluding buttock)  |
| SH22C00 | Deep partial thickness burn of the buttock                   |
| SH22x00 | Partial thickness burn of multiple sites of the trunk        |
| SH22z00 | Partial thickness burn of the trunk NOS                      |
| SH23.00 | Full thickness burn of the trunk                             |
| SH23000 | Full thickness burn of the trunk, unspecified                |
| SH23100 | Full thickness burn of the breast                            |
| SH23200 | Full thickness burn of the chest wall                        |
| SH23300 | Full thickness burn of the abdominal wall                    |
| SH23400 | Full thickness burn of the back (excluding buttock)          |
| SH23500 | Full thickness burn of the buttock                           |
| SH23z00 | Full thickness burn of the trunk NOS                         |
| SH24.00 | Deep full thickness burn of trunk without loss of body part  |
| SH24000 | Deep full thickness burn of trunk unsp, no loss of body part |
| SH24100 | Deep full thickness burn of breast without loss of body part |
| SH24200 | Deep full thickness burn of chest without loss of body part  |
| SH24300 | Deep full thickness burn of abdom.wall, no loss of body part |
| SH24400 | Deep full thickness burn of back without loss of body part   |
| SH24500 | Deep full thickness burn of buttock, no loss of body part    |
| SH25.00 | Deep full thickness burn of trunk, with loss of body part    |
| SH25200 | Deep full thickness burn of chest, with loss of body part    |
| SH25500 | Deep full thickness burn of buttock, with loss of body part  |
| SH2z.00 | Burn of the trunk NOS                                        |
| SH3..00 | Burn of the arm (excluding wrist and hand)                   |
| SH30.00 | Unspecified thickness burn of the arm                        |
| SH30000 | Unspecified thickness burn of the arm, unspecified           |
| SH30100 | Unspecified thickness burn of the forearm                    |
| SH30200 | Unspecified thickness burn of the elbow                      |
| SH30300 | Unspecified thickness burn of the upper arm                  |
| SH30400 | Unspecified thickness burn of the axilla                     |
| SH30500 | Unspecified thickness burn of the shoulder                   |

|         |                                                             |
|---------|-------------------------------------------------------------|
| SH30600 | Unspecified thickness burn of the scapular region           |
| SH30x00 | Unspecified thickness burn of multiple sites of the arm     |
| SH30z00 | Unspecified thickness burn of the arm NOS                   |
| SH31.00 | Superficial burn of the arm                                 |
| SH31.11 | Erythema of arm, first degree burn                          |
| SH31000 | Superficial burn of the arm, unspecified                    |
| SH31100 | Superficial burn of the forearm                             |
| SH31200 | Superficial burn of the elbow                               |
| SH31300 | Superficial burn of the upper arm                           |
| SH31400 | Superficial burn of the axilla                              |
| SH31500 | Superficial burn of the shoulder                            |
| SH31600 | Superficial burn of the scapular region                     |
| SH31x00 | Superficial burn of multiple sites of the arm               |
| SH31z00 | Superficial burn of the arm NOS                             |
| SH32.00 | Partial thickness burn of the arm                           |
| SH32.11 | Blister of arm, second degree burn                          |
| SH32000 | Superficial partial thickness burn of the arm, unspecified  |
| SH32100 | Superficial partial thickness burn of the forearm           |
| SH32200 | Superficial partial thickness burn of the elbow             |
| SH32300 | Superficial partial thickness burn of the upper arm         |
| SH32500 | Superficial partial thickness burn of the shoulder          |
| SH32600 | Superficial partial thickness burn of scapular region       |
| SH32700 | Deep partial thickness burn of the arm, unspecified         |
| SH32800 | Deep partial thickness burn of the forearm                  |
| SH32900 | Deep partial thickness burn of the elbow                    |
| SH32A00 | Deep partial thickness burn of the upper arm                |
| SH32D00 | Deep partial thickness burn of the scapular region          |
| SH32x00 | Partial thickness burn of multiple sites of the arm         |
| SH32z00 | Partial thickness burn of the arm NOS                       |
| SH33.00 | Full thickness burn of the arm                              |
| SH33000 | Full thickness burn of the arm, unspecified                 |
| SH33100 | Full thickness burn of the forearm                          |
| SH33200 | Full thickness burn of the elbow                            |
| SH33300 | Full thickness burn of the upper arm                        |
| SH33400 | Full thickness burn of the axilla                           |
| SH33500 | Full thickness burn of the shoulder                         |
| SH34.00 | Deep full thickness burn of arm without loss of body part   |
| SH34100 | Deep full thickness burn of forearm, no loss of body part   |
| SH34200 | Deep full thickness burn of elbow without loss of body part |
| SH34300 | Deep full thickness burn of upper arm, no loss of body part |
| SH34500 | Deep full thickness burn of shoulder, no loss of body part  |
| SH35400 | Deep full thickness burn of axilla, with loss of body part  |
| SH3z.00 | Burn of the arm (excluding wrist and hand) NOS              |
| SH4..00 | Burn of the wrist(s) and hand(s)                            |
| SH40.00 | Unspecified thickness burn of the wrist and hand            |
| SH40.11 | Unspecified degree burn of finger                           |

|         |                                                            |
|---------|------------------------------------------------------------|
| SH40.12 | Unspecified degree burn of hand                            |
| SH40.13 | Unspecified degree burn of thumb                           |
| SH40.14 | Unspecified degree burn of wrist                           |
| SH40000 | Unspecified thickness burn of the hand, unspecified        |
| SH40100 | Unspecified thickness burn of a single finger              |
| SH40200 | Unspecified thickness burn of the thumb                    |
| SH40300 | Unspecified thickness burn of more than one finger         |
| SH40400 | Unspecified thickness burn of the thumb and finger(s)      |
| SH40500 | Unspecified thickness burn of the palm of hand             |
| SH40600 | Unspecified thickness burn of the back of hand             |
| SH40700 | Unspecified thickness burn of the wrist                    |
| SH40x00 | Unspecified thickness burn of multiple sites of wrist/hand |
| SH40z00 | Unspecified thickness burn of the wrist or hand NOS        |
| SH41.00 | Superficial burn of the wrist and hand                     |
| SH41.11 | Erythema of wrist and hand,first degree burn               |
| SH41.12 | First degree burn of finger                                |
| SH41.13 | First degree burn of hand                                  |
| SH41.14 | First degree burn of thumb                                 |
| SH41.15 | First degree burn of wrist                                 |
| SH41000 | Superficial burn of the hand, unspecified                  |
| SH41100 | Superficial burn of a single finger                        |
| SH41200 | Superficial burn of the thumb                              |
| SH41300 | Superficial burn of more than one finger                   |
| SH41400 | Superficial burn of the thumb and finger(s)                |
| SH41500 | Superficial burn of the palm of hand                       |
| SH41600 | Superficial burn of the back of hand                       |
| SH41700 | Superficial burn of the wrist                              |
| SH41x00 | First degree burn of multiple sites of the wrist or hand   |
| SH41z00 | Superficial burn of the wrist or hand NOS                  |
| SH42.00 | Partial thickness burn of the wrist and hand               |
| SH42.11 | Blister of wrist and hand, second degree burn              |
| SH42.12 | Second degree burn of finger                               |
| SH42.13 | Second degree burn of hand                                 |
| SH42.14 | Second degree burn of thumb                                |
| SH42.15 | Second degree burn of wrist                                |
| SH42000 | Superficial partial thickness burn of hand, unspecified    |
| SH42100 | Superficial partial thickness burn of a single finger      |
| SH42200 | Superficial partial thickness burn of the thumb            |
| SH42300 | Superficial partial thickness burn of more than one finger |
| SH42400 | Superficial partial thickness burn of thumb and finger(s)  |
| SH42500 | Superficial partial thickness burn of palm of hand         |
| SH42600 | Superficial partial thickness burn of back of hand         |
| SH42700 | Superficial partial thickness burn of the wrist            |
| SH42800 | Deep partial thickness burn of the hand, unspecified       |
| SH42900 | Deep partial thickness burn of a single finger             |
| SH42A00 | Deep partial thickness burn of the thumb                   |

|         |                                                               |
|---------|---------------------------------------------------------------|
| SH42D00 | Deep partial thickness burn of the palm of hand               |
| SH42E00 | Deep partial thickness burn of back of hand                   |
| SH42F00 | Deep partial thickness burn of wrist                          |
| SH42x00 | Partial thickness burn of multiple sites of the wrist/hand    |
| SH42z00 | Partial thickness burn of the wrist or hand NOS               |
| SH43.00 | Full thickness burn of the wrist and hand                     |
| SH43.11 | Third degree burn of finger                                   |
| SH43.12 | Third degree burn of hand                                     |
| SH43.14 | Third degree burn of wrist                                    |
| SH43000 | Full thickness burn of the hand, unspecified                  |
| SH43100 | Full thickness burn of a single finger                        |
| SH43200 | Full thickness burn of the thumb                              |
| SH43300 | Full thickness burn of more than one finger                   |
| SH43400 | Full thickness burn of the thumb and finger(s)                |
| SH43500 | Full thickness burn of the palm of hand                       |
| SH43600 | Full thickness burn of the back of hand                       |
| SH43700 | Full thickness burn of the wrist                              |
| SH43z00 | Full thickness burn of the wrist or hand NOS                  |
| SH44.00 | Deep full thickness burn of wrist/hand, no loss of body part  |
| SH44.11 | Deep third degree burn of finger, without loss of a body part |
| SH44.12 | Deep third degree burn of hand, without loss of a body part   |
| SH44.13 | Deep third degree burn of thumb, without loss of a body part  |
| SH44.14 | Deep third degree burn of wrist, without loss of a body part  |
| SH44000 | Deep full thickness burn of hand unsp, no loss of body part   |
| SH44100 | Deep full thickness burn of a finger, no loss of body part    |
| SH44200 | Deep full thickness burn of thumb without loss of body part   |
| SH44400 | Deep full thickness burn of thumb+fing, no loss of body part  |
| SH44500 | Deep full thickness burn of palm hand, no loss of body part   |
| SH44700 | Deep full thickness burn of wrist without loss of body part   |
| SH45.11 | Deep third degree burn of finger with loss of a body part     |
| SH45.14 | Deep third degree burn of wrist with loss of a body part      |
| SH4z.00 | Burn of wrist or hand NOS                                     |
| SH5..00 | Burn of lower limbs                                           |
| SH5..11 | Leg burns                                                     |
| SH50.00 | Unspecified thickness burn of the leg                         |
| SH50000 | Unspecified degree burn of the leg, unspecified               |
| SH50100 | Unspecified thickness burn of the toe(s)                      |
| SH50200 | Unspecified thickness burn of the foot                        |
| SH50300 | Unspecified thickness burn of the ankle                       |
| SH50400 | Unspecified thickness burn of the lower leg                   |
| SH50500 | Unspecified thickness burn of the knee                        |
| SH50600 | Unspecified thickness burn of the thigh                       |
| SH50x00 | Unspecified thickness burn of multiple sites of the leg       |
| SH50z00 | Unspecified thickness burn of the leg NOS                     |
| SH51.00 | Superficial burn of the leg                                   |
| SH51.11 | Erythema of leg, first degree burn                            |

|         |                                                             |
|---------|-------------------------------------------------------------|
| SH51000 | Superficial burn of the leg, unspecified                    |
| SH51100 | Superficial burn of the toe(s)                              |
| SH51200 | Superficial burn of the foot                                |
| SH51300 | Superficial burn of the ankle                               |
| SH51400 | Superficial burn of the lower leg                           |
| SH51500 | Superficial burn of the knee                                |
| SH51600 | Superficial burn of the thigh                               |
| SH51x00 | Superficial burn of multiple sites of the leg               |
| SH51z00 | Superficial burn of the leg NOS                             |
| SH52.00 | Partial thickness burn of the leg                           |
| SH52.11 | Blister of leg, second degree burn                          |
| SH52000 | Superficial partial thickness burn of the leg, unspecified  |
| SH52100 | Superficial partial thickness burn of the toe(s)            |
| SH52200 | Superficial partial thickness burn of the foot              |
| SH52300 | Superficial partial thickness burn of the ankle             |
| SH52400 | Superficial partial thickness burn of the lower leg         |
| SH52500 | Superficial partial thickness burn of the knee              |
| SH52600 | Superficial partial thickness burn of the thigh             |
| SH52700 | Deep partial thickness burn of the leg, unspecified         |
| SH52800 | Deep partial thickness burn of the toe(s)                   |
| SH52900 | Deep partial thickness burn of the foot                     |
| SH52A00 | Deep partial thickness burn of the ankle                    |
| SH52B00 | Deep partial thickness burn of the lower leg                |
| SH52C00 | Deep partial thickness burn of the knee                     |
| SH52D00 | Deep partial thickness burn of the thigh                    |
| SH52x00 | Partial thickness burn of multiple sites of the leg         |
| SH52z00 | Partial thickness burn of the leg NOS                       |
| SH53.00 | Full thickness burn of the leg                              |
| SH53000 | Full thickness burn of the leg, unspecified                 |
| SH53100 | Full thickness burn of the toe(s)                           |
| SH53200 | Full thickness burn of the foot                             |
| SH53300 | Full thickness burn of the ankle                            |
| SH53400 | Full thickness burn of the lower leg                        |
| SH53500 | Full thickness burn of the knee                             |
| SH53600 | Full thickness burn of the thigh                            |
| SH53x00 | Full thickness burn of multiple sites of the leg            |
| SH53z00 | Full thickness burn of the leg NOS                          |
| SH54.00 | Deep full thickness burn of leg without loss of body part   |
| SH54000 | Deep full thickness burn of leg unsp, no loss of body part  |
| SH54200 | Deep full thickness burn of foot without loss of body part  |
| SH54300 | Deep full thickness burn of ankle without loss of body part |
| SH54400 | Deep full thickness burn of lower leg without loss of body  |
| SH54500 | Deep full thickness burn of knee without loss of body part  |
| SH54600 | Deep full thickness burn of thigh without loss of body part |
| SH55.00 | Deep full thickness burn of leg, with loss of body part     |
| SH55100 | Deep full thickness burn of toe(s), with loss of body part  |



|         |                                                             |
|---------|-------------------------------------------------------------|
| SH55200 | Deep full thickness burn of foot, with loss of body part    |
| SH55300 | Deep full thickness burn of ankle, with loss of body part   |
| SH5z.00 | Burn of the lower limb NOS                                  |
| SH6..00 | Burn of multiple specified sites                            |
| SH60.00 | Unspecified thickness burn of multiple specified sites      |
| SH61.00 | Superficial burn of multiple specified sites                |
| SH62.00 | Partial thickness burn of multiple specified sites          |
| SH62000 | Superficial partial thickness burn multiple specified sites |
| SH62100 | Deep partial thickness burn of multiple specified sites     |
| SH63.00 | Full thickness burn of multiple specified sites             |
| SH7..00 | Burn of internal organs                                     |
| SH70.00 | Burn of the mouth and pharynx                               |
| SH70000 | Burn of the mouth, unspecified                              |
| SH70100 | Burn of the gum                                             |
| SH70200 | Burn of the tongue                                          |
| SH70300 | Burn of the pharynx                                         |
| SH70z00 | Burn of the mouth or pharynx NOS                            |
| SH71.00 | Burn of the larynx, trachea and lung                        |
| SH71000 | Burn of the larynx                                          |
| SH71100 | Burn of the trachea                                         |
| SH71200 | Burn of the lung                                            |
| SH71z00 | Burn of the larynx, trachea or lung NOS                     |
| SH72.00 | Burn of the oesophagus                                      |
| SH73.00 | Burn of the gastrointestinal tract                          |
| SH73000 | Burn of the stomach                                         |
| SH73100 | Burn of the small intestine                                 |
| SH73300 | Burn of the rectum                                          |
| SH73z00 | Burn of the gastrointestinal tract NOS                      |
| SH74.00 | Burn of the vagina and uterus                               |
| SH74000 | Burn of the vagina                                          |
| SH74z00 | Burn of the vagina or uterus NOS                            |
| SH7z.00 | Burn of internal organ NOS                                  |
| SH8..00 | Burns as a percentage of body surface (BS) involved         |
| SH80.00 | Burn involving <10% of body surface (BS)                    |
| SH80000 | Burn:<10% of body surface, 10%/unspec BS full thickness     |
| SH80z00 | Burn:<10% of body surface NOS                               |
| SH81.00 | Burn involving 10-19% of body surface (BS)                  |
| SH81000 | Burn: 10-14% of body surface,<10%/unsp BS full thickness    |
| SH81100 | Burn: 10-14% of body surface, 10-14% BS full thickness      |
| SH81z00 | Burn: 10-19% of body surface NOS                            |
| SH82.00 | Burn involving 20-29% of body surface (BS)                  |
| SH82000 | Burn: 20-29% of body surface,<10%/unspec BS full thickness  |
| SH82z00 | Burn: 20-29% of body surface NOS                            |
| SH83.00 | Burn involving 30-39% of body surface (BS)                  |
| SH83z00 | Burn: 30-39% of body surface NOS                            |
| SH84.00 | Burn involving 40-49% of body surface (BS)                  |

|         |                                                              |
|---------|--------------------------------------------------------------|
| SH84400 | Burn: 40-49% of body surface, 40-49% BS full thickness       |
| SH84z00 | Burn: 40-49% of body surface NOS                             |
| SH85.00 | Burn involving 50-59% of body surface (BS)                   |
| SH85400 | Burn: 50-59% of body surface, 40-49% BS full thickness       |
| SH85z00 | Burn: 50-59% of body surface NOS                             |
| SH86.00 | Burn involving 60-69% of body surface (BS)                   |
| SH87.00 | Burn involving 70-79% of body surface (BS)                   |
| SH87500 | Burn: 70-79% of body surface, 50-59% BS full thickness       |
| SH89.00 | Burn involving >90% of body surface (BS)                     |
| SH8z.00 | Burn as a percentage of body surface involved NOS            |
| SH9..00 | Burn - unspecified                                           |
| SH90.00 | Unspecified degree of burn NOS                               |
| SH91.00 | Superficial burn NOS                                         |
| SH91.11 | First degree burn                                            |
| SH92.00 | Partial thickness burn NOS                                   |
| SH92.11 | Second degree burn                                           |
| SH92000 | Superficial partial thickness burn NOS                       |
| SH92100 | Deep partial thickness burn NOS                              |
| SH93.00 | Full thickness burn NOS                                      |
| SH93.11 | Third degree burn                                            |
| SH94.00 | Deep full thickness burn, without loss of body part, NOS     |
| SH9z.00 | Burn - unspecified                                           |
| SHz..00 | Burns NOS                                                    |
| SM7y200 | Smoke inhalation                                             |
| SM7z.11 | Smoke inhalation                                             |
| SyuD.00 | [X]Burns and corrosions                                      |
| SyuD000 | [X]Burns of other parts of eye and adnexa                    |
| SyuD500 | [X]Burns of other and unspecified internal organs            |
| SyuD800 | [X]Burns of mult reg, at least 1 burn of 3rd deg mentioned   |
| SyuDA00 | [X]Burn of unspecified body region, unspecified degree       |
| T03..00 | Train accident involving explosion, fire or burning          |
| T032.00 | Train accident involving burning                             |
| T338.00 | Fire in road vehicle NEC                                     |
| T410.00 | Burned while ship on fire                                    |
| T504.00 | Fire on aircraft while taking off                            |
| T504700 | Aircraft fire on takeoff - parachutist injured               |
| T514z00 | Fire on aircraft-flying - other person injured               |
| TD...00 | Accidents caused by fire and flames                          |
| TD0..00 | Conflagration in private dwelling                            |
| TD0..11 | House fire                                                   |
| TD00500 | Explosion caused by conflagration in house                   |
| TD01.00 | Fumes from combustion of PVC in conflagration-private dwell  |
| TD02.00 | Carbon monoxide fumes from conflagration in private dwelling |
| TD02000 | Carbon monoxide fumes from conflagration in apartment        |
| TD02500 | Carbon monoxide fumes from conflagration in house            |
| TD02800 | Carbon monoxide fumes from conflagration in private garage   |

|         |                                                              |
|---------|--------------------------------------------------------------|
| TD02z00 | Carbon monoxide fumes from conflagration private dwell NOS   |
| TD03.00 | Fumes NOS from conflagration in private dwelling             |
| TD03000 | Fumes NOS from conflagration in apartment                    |
| TD03500 | Fumes NOS from conflagration in house                        |
| TD04.00 | Smoke NOS from conflagration in private dwelling             |
| TD04500 | Smoke NOS from conflagration in house                        |
| TD04A00 | Smoke NOS from conflagration in tenement                     |
| TD04z00 | Smoke NOS from conflagration in private dwelling NOS         |
| TD05.00 | Burning caused by conflagration in private dwelling          |
| TD05000 | Burning caused by conflagration in apartment                 |
| TD05200 | Burning caused by conflagration in camping place             |
| TD05500 | Burning caused by conflagration in house                     |
| TD05z00 | Burning caused by conflagration in private dwelling NOS      |
| TD06100 | Accident due to collapse of burning boarding house           |
| TD07.00 | Accident due to fall from burning private dwelling           |
| TD07300 | Accident due to fall from burning caravan                    |
| TD07500 | Accident due to fall from burning house                      |
| TD08300 | Hit by object falling from burning caravan                   |
| TD08400 | Hit by object falling from burning farmhouse                 |
| TD09.00 | Jump from burning private dwelling                           |
| TD09z00 | Jump from burning private dwelling NOS                       |
| TD0z.00 | Accidents caused by conflagration in private dwelling NOS    |
| TD1..00 | Conflagration in other building or structure                 |
| TD10.00 | Explosion caused by conflagration - other building/structure |
| TD11.00 | Fumes from combustion of PVC in fire, in other structure     |
| TD12.00 | Carbon monoxide fumes from fire in other structure/building  |
| TD12z00 | Carbon monoxide fumes from fire in structure or building NOS |
| TD13.00 | Fumes NOS from conflagration in structure or building        |
| TD13500 | Fumes NOS from conflagration in factory                      |
| TD13z00 | Fumes NOS from conflagration in structure or building NOS    |
| TD14.00 | Smoke NOS from conflagration in structure or building        |
| TD15.00 | Burning caused by conflagration in other structure/building  |
| TD16.00 | Accident due to collapse of other burning structure/building |
| TD17.00 | Accident due to fall from other burning structure/building   |
| TD18100 | Hit by object falling from burning church                    |
| TD19.00 | Jump from other burning structure or building                |
| TD19100 | Jump from burning church                                     |
| TD19800 | Jump from burning hotel                                      |
| TD19z00 | Jump from burning structure or building NOS                  |
| TD1y.00 | Other accident due to fire in other structure/building       |
| TD20.00 | Uncontrolled fire in forest                                  |
| TD21.00 | Uncontrolled fire in grass                                   |
| TD22.00 | Uncontrolled fire in hay                                     |
| TD23.00 | Uncontrolled lumber fire                                     |
| TD24.00 | Uncontrolled fire in mine                                    |
| TD25.00 | Uncontrolled fire on prairie                                 |

|         |                                                             |
|---------|-------------------------------------------------------------|
| TD3..00 | Accidents caused by clothes on fire, ACOF                   |
| TD30000 | ACOF-contr fire in private dwelling - normal charcoal fire  |
| TD30300 | ACOF-contr fire in private dwelling - normal gas fire       |
| TD30500 | ACOF-contr fire in private dwelling - brazier               |
| TD32200 | ACOF-controlled fire in the open due to trash fire          |
| TD3y300 | Accident caused by clothes on fire from candle              |
| TD3y400 | Accident caused by clothes on fire from cigar               |
| TD3y500 | Accident caused by clothes on fire from cigarette           |
| TD3y600 | Accident caused by clothes on fire from lighter             |
| TD3y700 | Accident caused by clothes on fire from matches             |
| TD3y900 | Accident caused by clothes on fire from welding torch       |
| TD3z.00 | Ignition of clothing NOS                                    |
| TD41.00 | Ignition of gasoline with ignition of clothing              |
| TD42.00 | Ignition of fat with ignition of clothing                   |
| TD44.00 | Ignition of paraffin with ignition of clothing              |
| TD45.00 | Ignition of petrol with ignition of clothing                |
| TD46.00 | Ignition of liquid paraffin gas with ignition of clothing   |
| TD4z.00 | Ignition of highly inflammable material NOS                 |
| TD5..00 | Accident caused by controlled fire in private dwelling      |
| TD52.00 | Accident caused by normal electric fire in private dwelling |
| TD53.00 | Accident caused by normal gas fire in private dwelling      |
| TD57.00 | Accident caused by cooker, unspecified, in private dwelling |
| TD57000 | Accident caused by gas cooker in private dwelling           |
| TD57200 | Accident caused by electric cooker in private dwelling      |
| TD57300 | Accident by liquid paraffin gas cooker in private dwelling  |
| TD5z.00 | Accident caused by fireplace in private dwelling NOS        |
| TD62.00 | Accident caused by normal electric fire other struct/build  |
| TD63.00 | Accident caused by normal gas fire other structure/building |
| TD66.00 | Accident caused by furnace in other structure or building   |
| TD70.00 | Accident caused by controlled fire in the open, bonfire     |
| TD72.00 | Accident caused by controlled fire in the open, trash fire  |
| TDy..00 | Accident caused by other fire and flames                    |
| TDy0.00 | Burning bedclothes                                          |
| TDyy.00 | Accident caused by other flame                              |
| TDyy200 | Accident caused by candle                                   |
| TDyy300 | Accident caused by cigar                                    |
| TDyy400 | Accident caused by cigarette                                |
| TDyy500 | Accident caused by lamp                                     |
| TDyy600 | Accident caused by lighter                                  |
| TDyy800 | Accident caused by pipe                                     |
| TDyy900 | Accident caused by welding torch                            |
| TDyz.00 | Accident caused by other flame or fire NOS                  |
| TDz..00 | Accident caused by fire or flames NOS                       |
| TDz1.00 | Accident caused by unspecified fire                         |
| TG30000 | Accidentally burned by machinery                            |
| TG70.00 | Accident caused by fireworks                                |

|         |                                                              |
|---------|--------------------------------------------------------------|
| TG8..00 | Accidents caused by hot substance, caustic/corrosive, steam  |
| TG80.00 | Accidents caused by hot liquids and vapours,including steam  |
| TG80000 | Accidental burning/scalding caused by boiling water, unspec  |
| TG80100 | Accidental burning/scalding caused by boiling liquid, unspec |
| TG80200 | Accidental burning or scalding caused by liquid metal        |
| TG80300 | Accidental burning or scalding caused by steam               |
| TG80400 | Accidental burning/scalding by boiling water from kettle     |
| TG80500 | Accidental burning/scalding by boiling water from saucepan   |
| TG80600 | Accidental burning or scalding caused by tea                 |
| TG80700 | Accidental burning or scalding caused by coffee              |
| TG80800 | Accidental burning or scalding caused by chocolate           |
| TG80900 | Accidental burning or scalding caused by milk                |
| TG80A00 | Accidental burning/scalding caused by soup, stew or curries  |
| TG80B00 | Accidental burning or scalding caused by fat                 |
| TG80C00 | Accidental burning or scalding caused by steam from kettle   |
| TG80D00 | Accidental burning or scalding by steam from car radiator    |
| TG80y00 | Accidental burning or scalding caused by other hot vapour    |
| TG80z00 | Accidental burning/scalding caused by hot liquid/vapour NOS  |
| TG8y.00 | Accidental burning caused by other hot substance or object   |
| TG8y000 | Accid burning caused by heat from electric heating appliance |
| TG8y100 | Accidental burning caused by light bulb                      |
| TG8y200 | Accidental burning caused by steam pipe                      |
| TG8y300 | Accidental burning or scalding caused by bitumen or tar      |
| TG8y400 | Accidental burning or scalding caused by plastic             |
| TG8yz00 | Accidental burning caused by hot object NOS                  |
| TG8z.00 | Accident caused by hot substance,caustic/corrosive,steam NOS |
| TG9z000 | Accidental burn or other injury from electric current NOS    |
| TN81.00 | Injury ?accidental, by burns or fire                         |
| TN82.00 | Injury ?accidental, by scald                                 |
| U16..00 | [X]Exposure to smoke, fire and flames                        |
| U160000 | [X]Exposure to uncontr fire in building/structur occ home    |
| U161000 | [X]Exposur uncontrol fire not in building/structure occ home |
| U162000 | [X]Exposure to controlld fire in building/structur occ home  |
| U163.00 | [X]Exposure to controlled fire, not in building / structure  |
| U163011 | [X]Exposure to bonfire                                       |
| U16y.00 | [X]Exposure to other specified smoke, fire and flames        |
| U16y000 | [X]Exposure to oth specif smoke fire+flames occurrn at home  |
| U16z.00 | [X]Exposure to unspecified smoke, fire and flames            |
| U16z000 | [X]Exposure to unspecifd smoke fire/flames occurrn at home   |
| U16z200 | [X]Exposr unspecif smoke fire/flame sch oth ins/pub adm area |
| U16z600 | [X]Exposur unspecif smoke fire/flame occ indust/constr area  |
| U16zz00 | [X]Exposur unspecif smoke fire/flame occurrn unspecif place  |
| U17..00 | [X]Contact with heat and hot substances                      |
| U17..11 | [X]Cause of accident burn / scald                            |
| U170.00 | [X]Contact with hot drinks, food, fats and cooking oils      |
| U170000 | [X]Contact with hot drink food fat+cooking oil occurrn home  |

|         |                                                              |
|---------|--------------------------------------------------------------|
| U170200 | [X]Cont hot drink food fat+cook oil sch oth ins/pub adm area |
| U170z00 | [X]Contact hot drink food fat+cook oil occurrn unspecif plce |
| U171.00 | [X]Contact with hot tap-water                                |
| U171000 | [X]Contact with hot tap-water, occurrence at home            |
| U172.00 | [X]Contact with other hot fluids                             |
| U172000 | [X]Contact with other hot fluids, occurrence at home         |
| U172z00 | [X]Contact with other hot fluids occurrn at unspecif place   |
| U173.00 | [X]Contact with steam and hot vapours                        |
| U173000 | [X]Contact with steam and hot vapours, occurrence at home    |
| U173200 | [X]Contact with steam+hot vapour, sch oth inst/pub adm area  |
| U173500 | [X]Contact with steam+hot vapour occurrn trade/service area  |
| U174.00 | [X]Contact with hot air and gases                            |
| U175.00 | [X]Contact with hot household appliances                     |
| U175000 | [X]Contact with hot household appliances occurrence at home  |
| U175600 | [X]Contact wth hot househld applianc occ indust/constr area  |
| U176.00 | [X]Contact with hot heating appliances, radiators and pipes  |
| U177000 | [X]Contact with hot engines machinery+tools occurrn at home  |
| U177500 | [X]Contct wth hot engin machinry+tool occ trade/service area |
| U178.00 | [X]Contact with other hot metals                             |
| U178z00 | [X]Contact with other hot metals occurrn at unspecif place   |
| U17y.00 | [X]Contact with other and unspecif heat and hot substances   |
| U17y000 | [X]Contact with oth+unspecif heat+hot substnc occurrn home   |
| U17y600 | [X]Contact oth+unspec heat+hot subst occ indust/constr area  |
| U17yz00 | [X]Contact oth+unspecif heat+hot substn occ unspecif place   |
| U47..00 | [X]Exposure to smoke, fire and flames, undetermined intent   |
| U470.00 | [X]Exposure to smoke fire+flame undeterm intent occ at home  |
| Z1B1400 | Attention to dressing of burnt skin                          |
| Z1B2100 | Dressing of burnt skin                                       |
| Z1B2111 | Burn dressing                                                |
| Z1B2200 | Covering burnt skin with plastic bag                         |
| ZQ3A.00 | Assessment of burn injuries                                  |
| ZQ3A.11 | Assessment of levels of burns                                |
