# Supplementary material for: Differing patterns in thermal injury incidence and hospitalisations among 0–4 year old children from England
Source: PubMed Central journal article supplement (PMC5062947; doi:10.1016/j.burns.2016.05.007), 2016-11

Supplementary file 3: Thermal injury incidence, hospitalisations, and hospitalisations requiring admission for 72 hours or more, according to child age

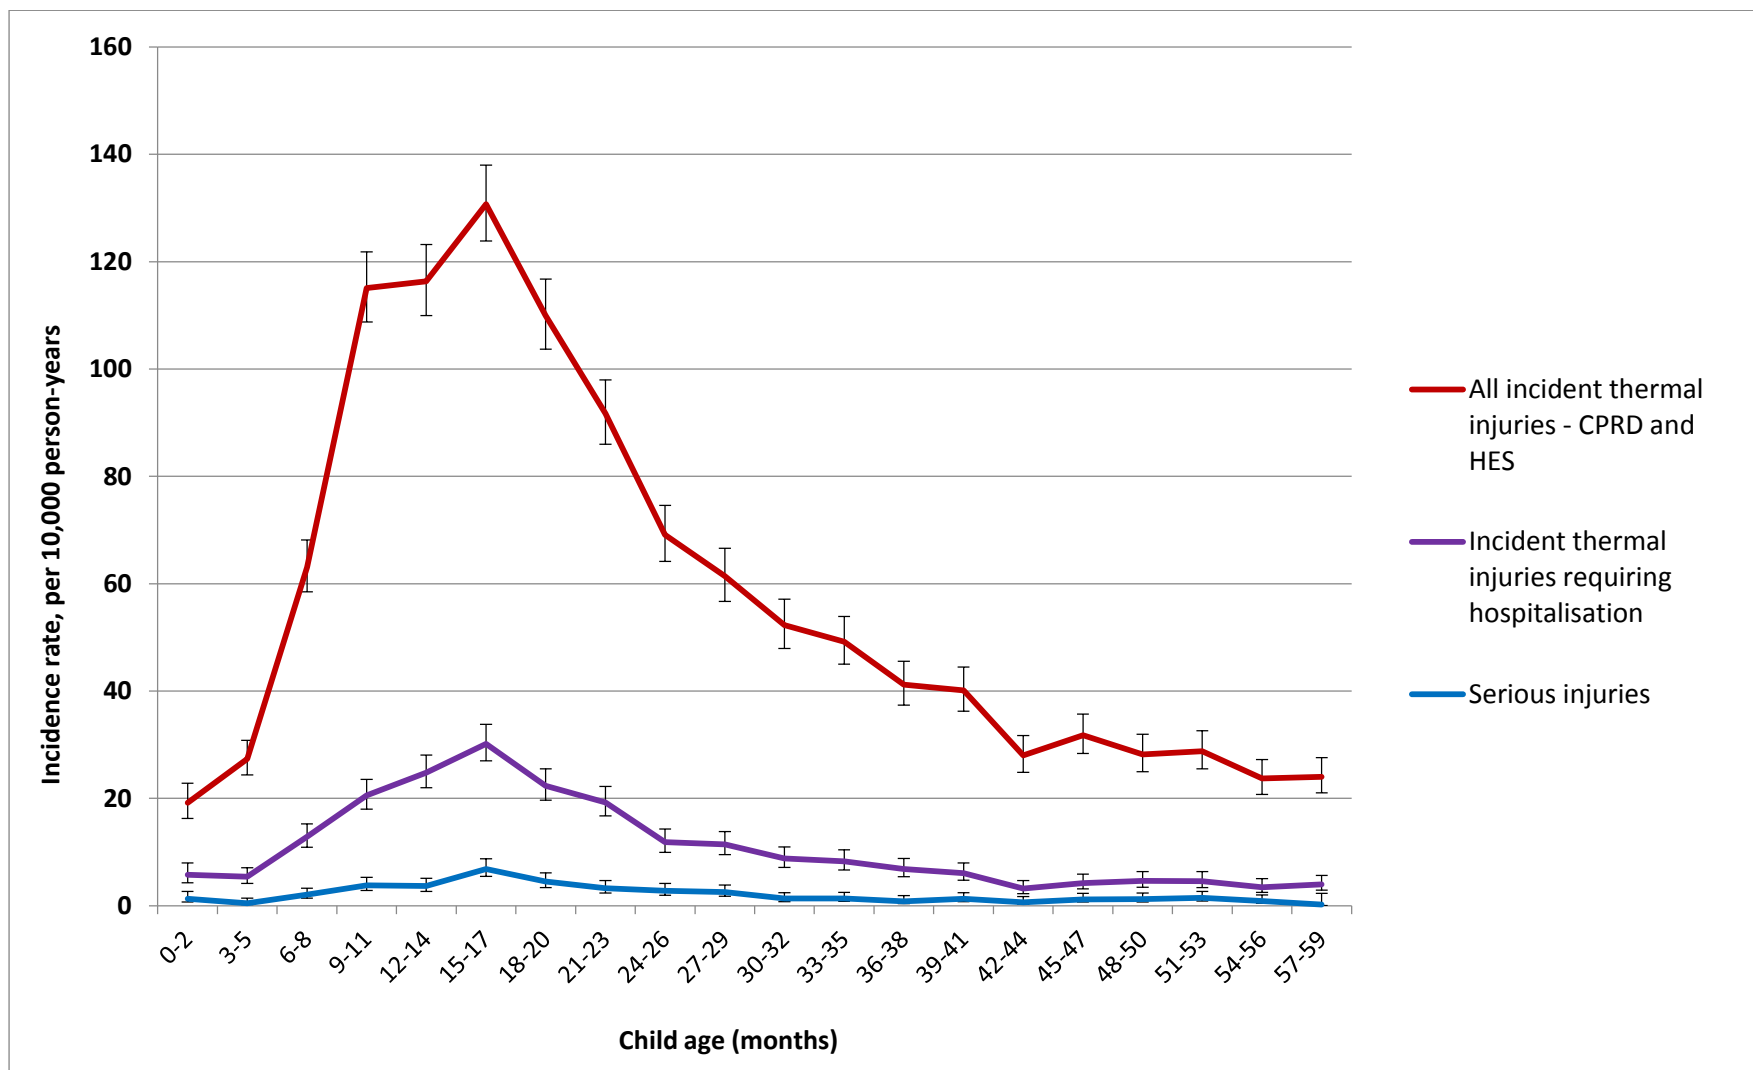

Supplement: mmc3.pdf [file mmc3.pdf]
